# Supplementary material for: ZDHHC5-mediated S-palmitoylation of FAK promotes its membrane localization and epithelial-mesenchymal transition in glioma
Source: PubMed Central journal article supplement (PMC10795333; doi:10.1186/s12964-023-01366-z), 2024-01-17

Fig3

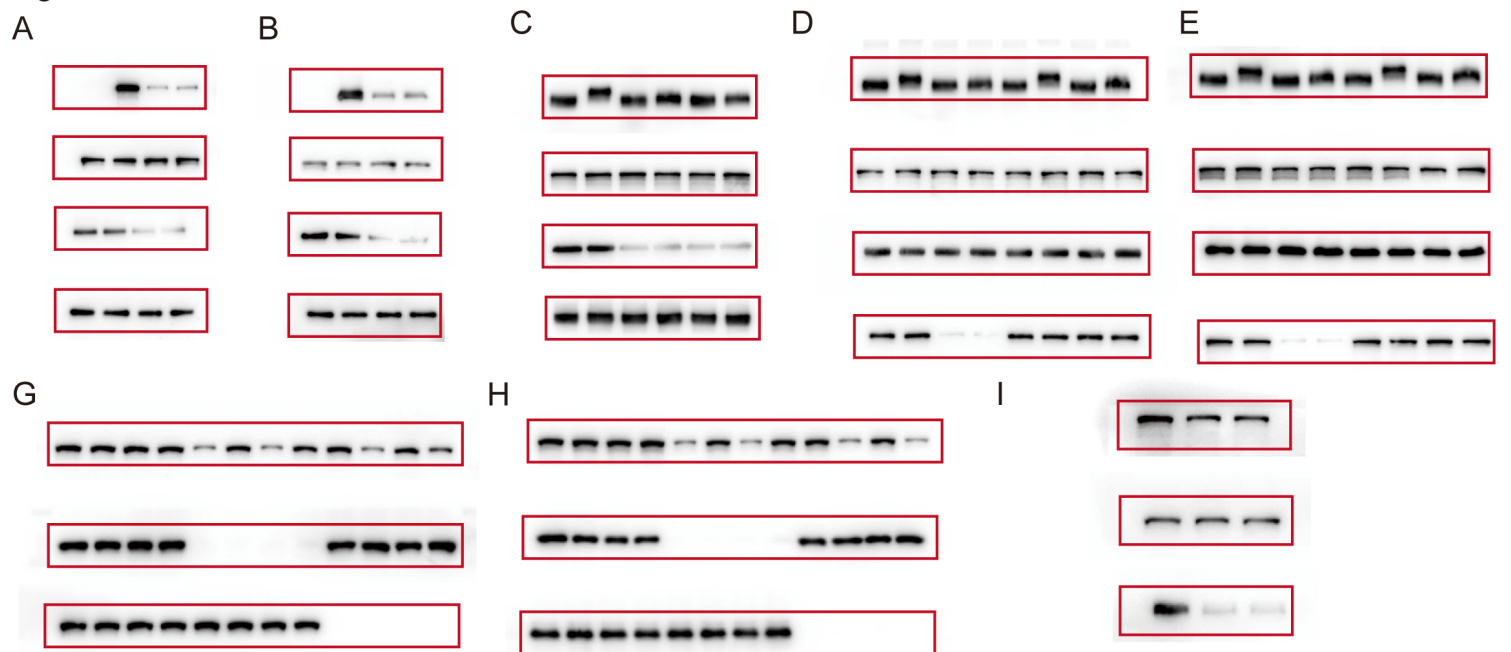

Fig4

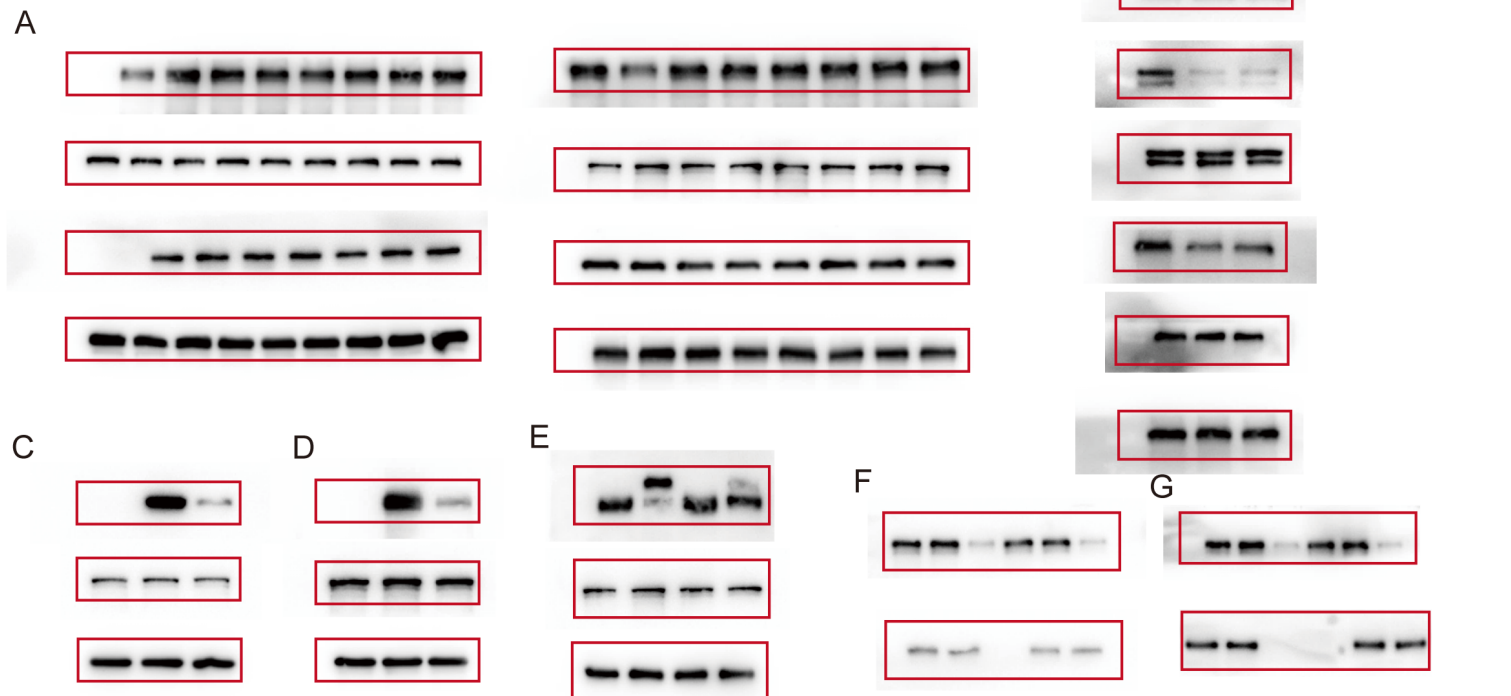

Fig5

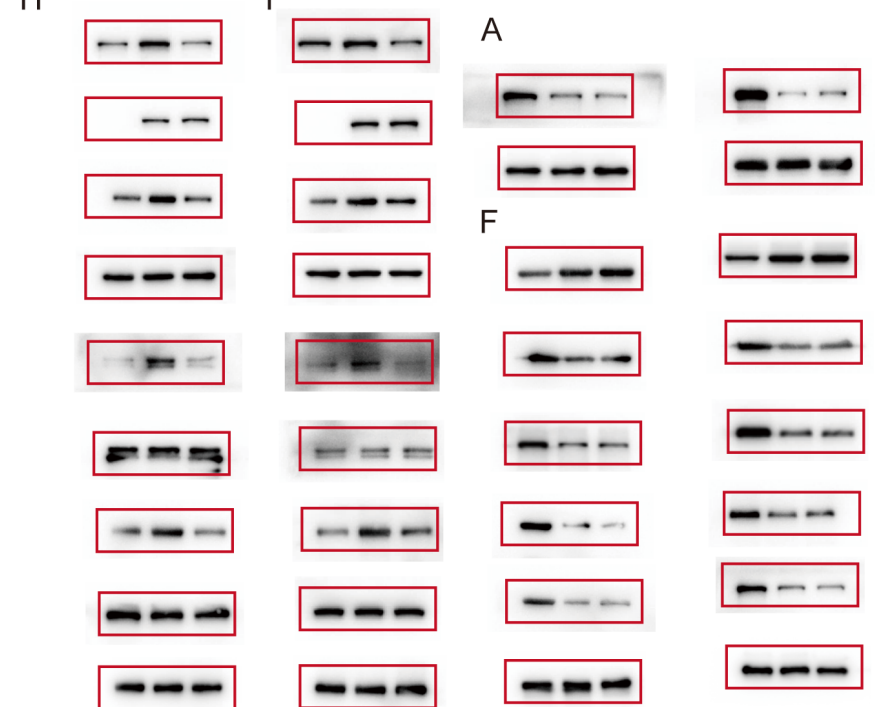

Fig7

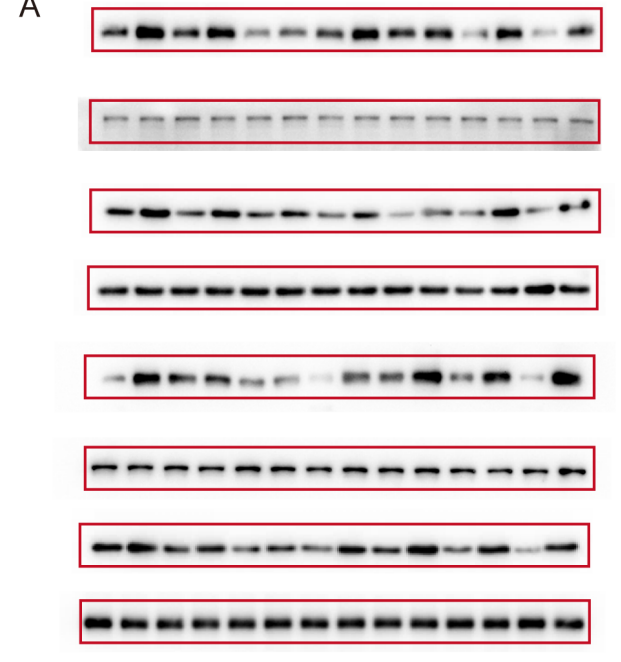

Figure S1

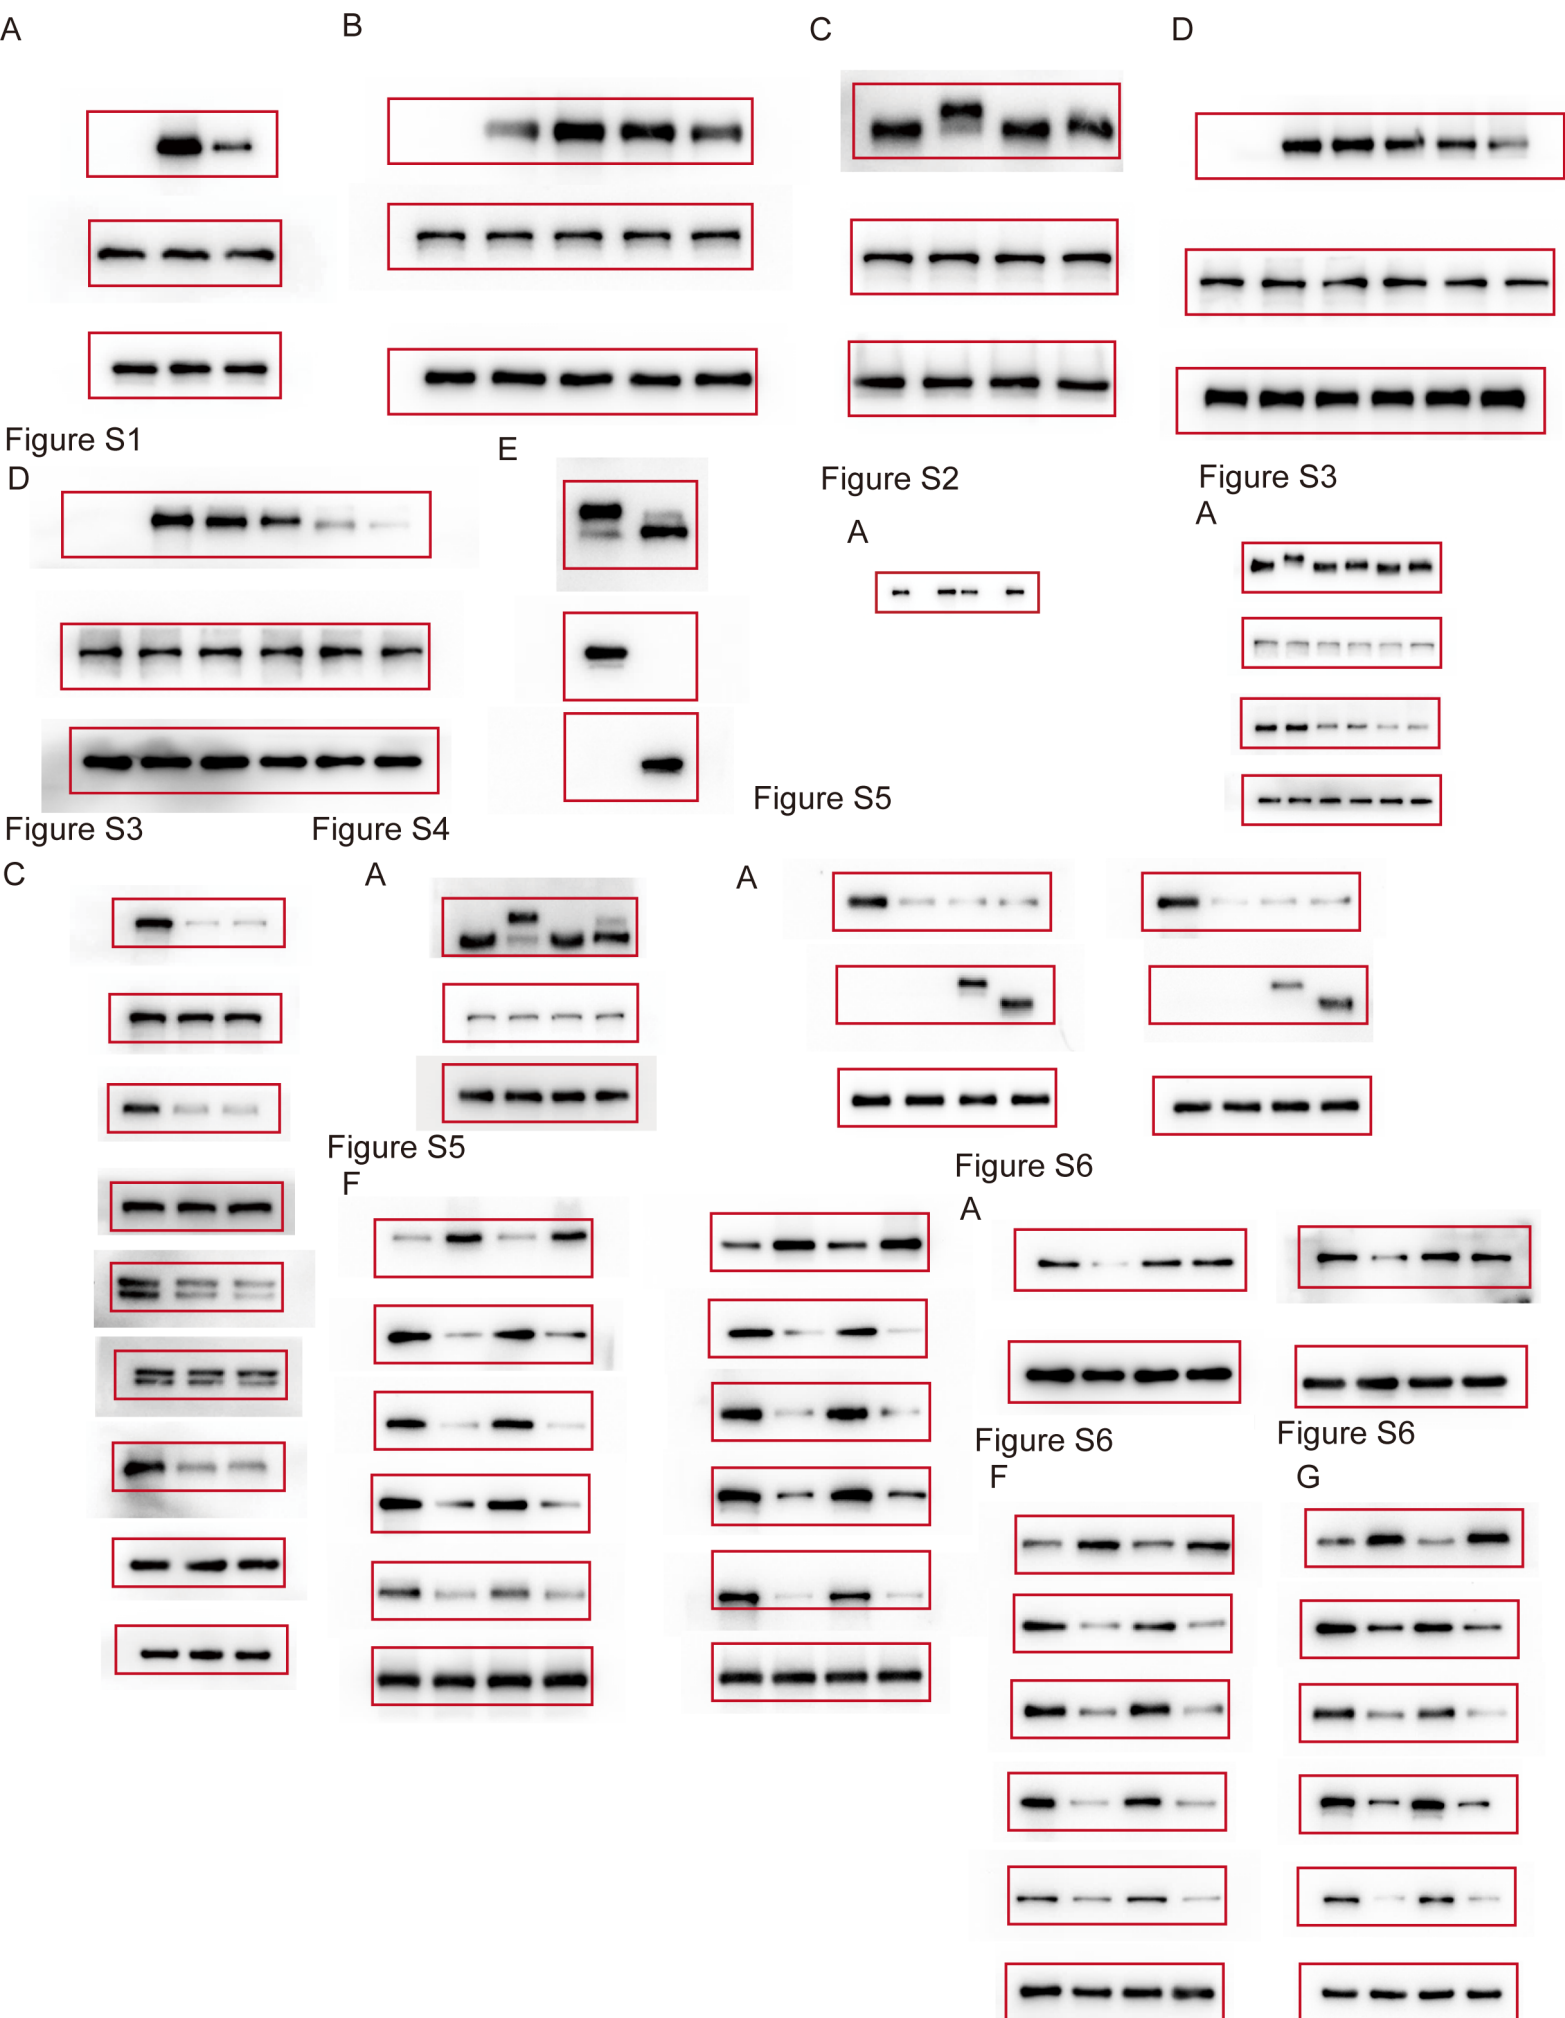

Fig1

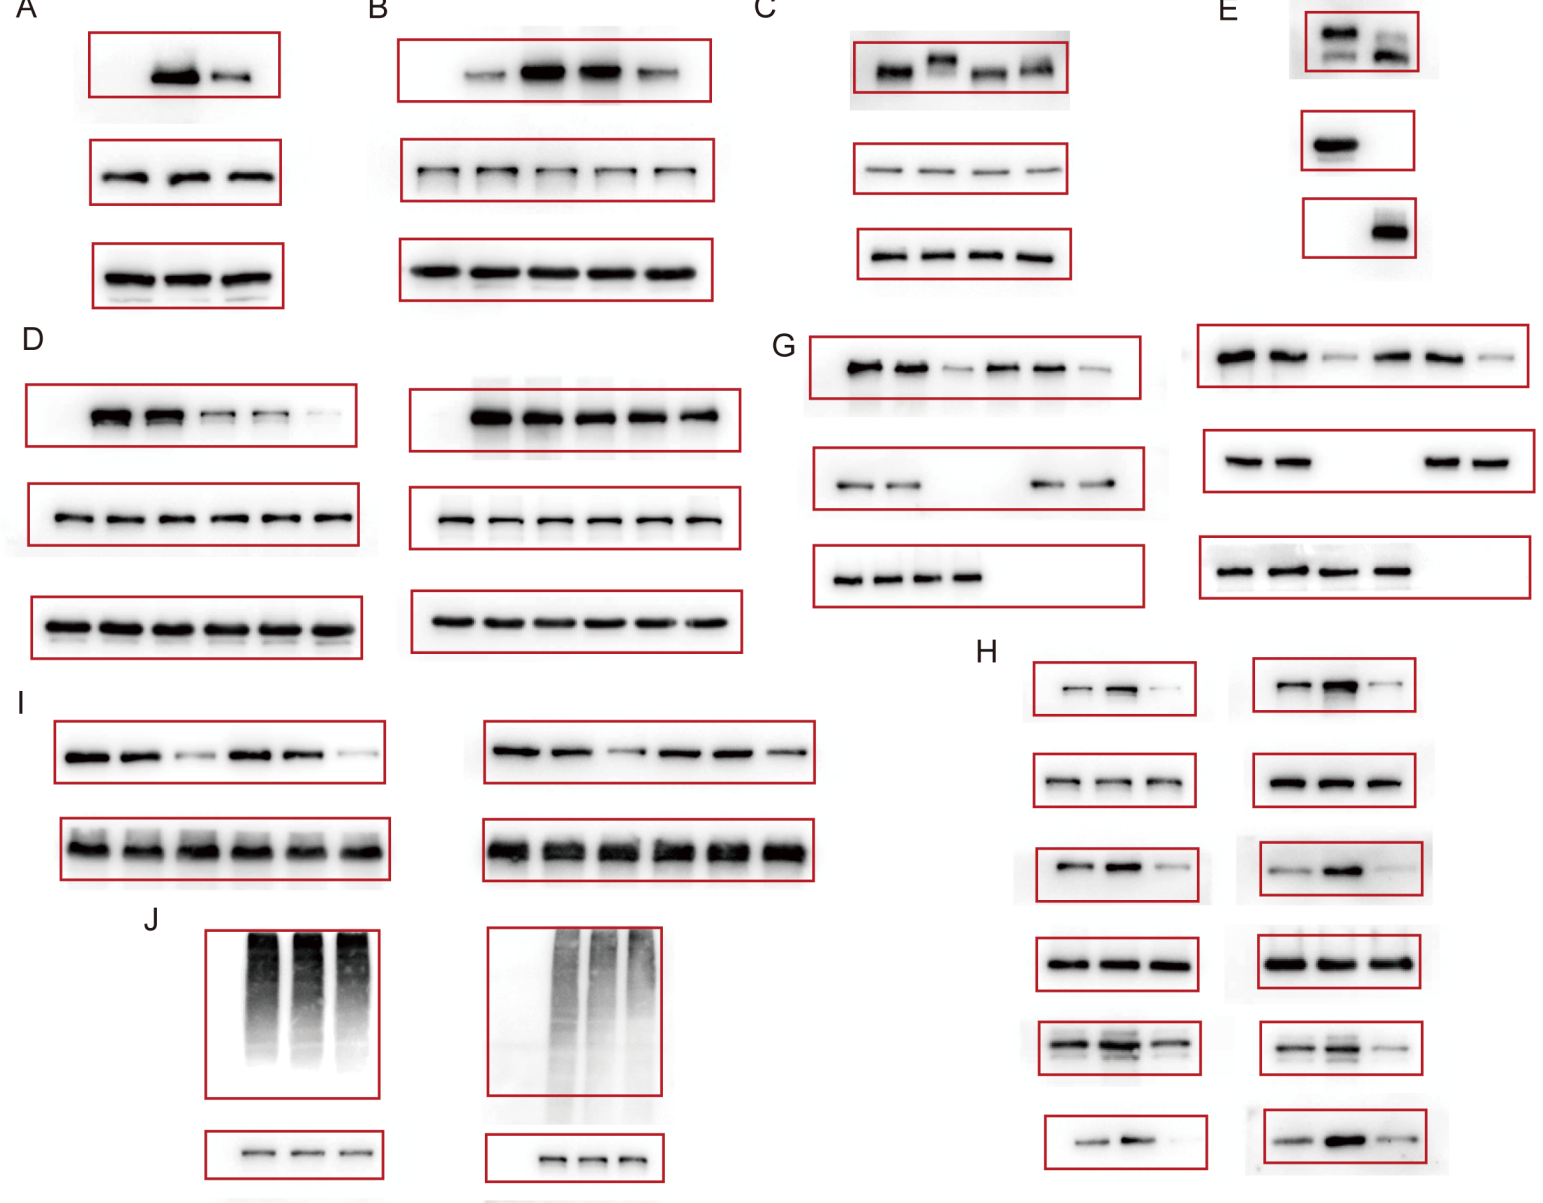

Fig2

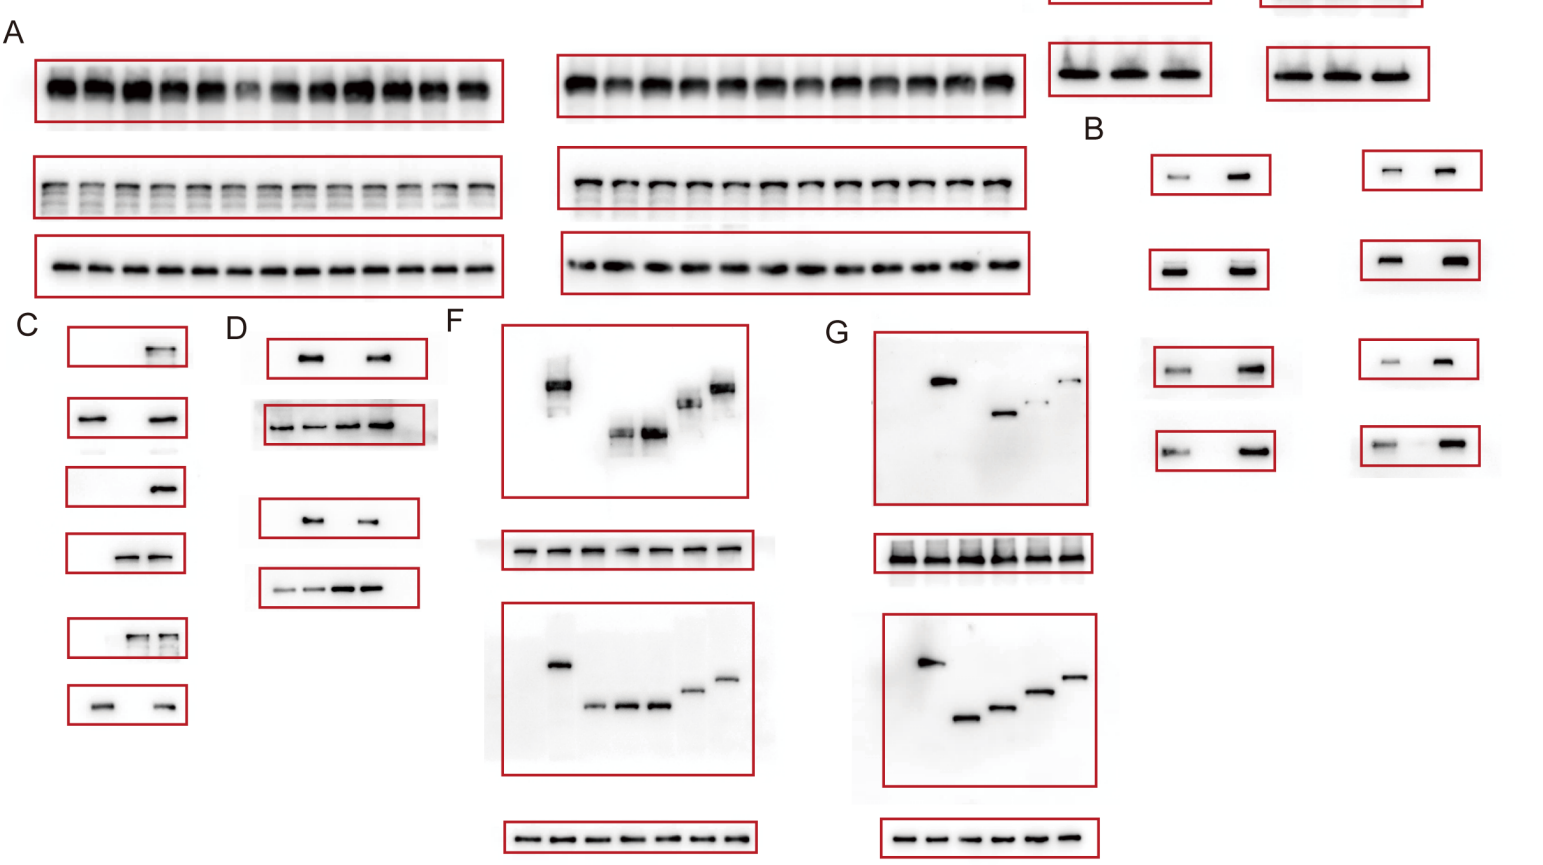

Supplement: 12964_2023_1366_MOESM2_ESM.pdf [file 12964_2023_1366_MOESM2_ESM.pdf]
